1 Full title: Acceptability and feasibility of tests for infection, serological testing and photography

2 to define need for interventions against trachoma

3 Short title: Acceptability and feasibility of complementary indicators for trachoma

4 Journal: PLoS NTD

5 Authors and affiliations:

6 Kristen K Renneker<sup>1,2\*</sup>, Tara B Mtuy<sup>1,3</sup>, George Kabona<sup>4</sup>, Stephen Gabriel Mbwambo<sup>4</sup>, Patrick

7 Moshia<sup>2</sup>, Jeremiah Mepukori Mollel<sup>2</sup>, PJ Hooper<sup>2</sup>, Paul M Emerson<sup>2</sup>, T. Deirdre Hollingsworth<sup>5</sup>,

8 Robert Butcher<sup>1</sup>, Anthony W Solomon<sup>6</sup>, Emma M Harding-Esch<sup>1</sup>

9 1. Clinical Research Department, Faculty of Infectious and Tropical Diseases, London

10 School of Hygiene & Tropical Medicine, London, United Kingdom

11 2. International Trachoma Initiative, The Task Force for Global Health, Decatur, Georgia,

12 United States of America

13 3. Kilimanjaro Christian Medical Centre, Moshi, Tanzania

14 4. National Neglected Tropical Diseases Control Programme, Preventive Services

15 Department, Ministry of Health, Tanzania

16 5. Big Data Institute, Li Ka Shing Centre for Health Information and Discovery, University

17 of Oxford, Oxford, UK

18 6. Global Neglected Tropical Diseases Programme, World Health Organization, Geneva,

19 Switzerland

20 \*Corresponding author: Email: [krenneker@taskforce.org](mailto:krenneker@taskforce.org) (KKR)

21

22 **Abstract** (PLoS NTD word limit = 300, current word count =300)

23 **Background:** Trachoma causes blindness due to repeated conjunctival infection by *Chlamydia*  
24 *trachomatis* (*Ct*). Transmission intensity is estimated, for programmatic decision-making, by  
25 prevalence of the clinical sign trachomatous inflammation—follicular (TF) in children aged 1–9  
26 years. Research into complementary indicators to field-graded TF includes work on conjunctival  
27 photography, tests for ocular *Ct* infection, and serology. The perceived acceptability and  
28 feasibility of these indicators among a variety of stakeholders is unknown.

29 **Methodology:** Focus group discussions (FGDs) with community members and in-depth  
30 interviews (IDIs) with public health practitioners in Tanzania were conducted. FGDs explored  
31 themes including participants' experience with, and thoughts about, different diagnostic  
32 approaches. The framework method for content analysis was used. IDIs yielded lists of perceived  
33 strengths of, and barriers to, implementation for programmatic use of each indicator. These were  
34 used to form an online quantitative survey on complementary indicators distributed to global  
35 stakeholders via meetings, mailing lists, and social media posts.

36 **Results:** Sixteen FGDs and 11 IDIs were conducted in October–November 2022. In general, all  
37 proposed sample methods were deemed acceptable by community members. Common themes  
38 included not wanting undue discomfort and a preference for tests perceived as accurate. Health  
39 workers noted the importance of community education for some sample types. The online survey  
40 was conducted in April–May 2023 with 98 starting the questionnaire and 81 completing it.  
41 Regarding barriers to implementing diagnostics, the highest agreement items related to  
42 feasibility, rather than acceptability. No evidence of significant differences was found in  
43 responses pertaining to community acceptability based on participant characteristics.

44 **Conclusions:** All of the indicators included were generally deemed acceptable by all  
45 stakeholders in Tanzania, although community education around the benefits and risks of  
46 different sample types, as well as addressing issues around feasibility, will be key to successful,  
47 sustainable integration of these indicators into trachoma programs.

48

49

50 **Author Summary (limit = 200, current =200)**

51 Trachoma is a disease that causes blindness through conjunctival infection with the bacterium  
52 *Chlamydia trachomatis*. Trachoma is targeted for global elimination by 2030. To know whether  
53 population-level interventions are required, we must know how intensely conjunctival *C.*  
54 *trachomatis* is being transmitted in a population. The current proxy recommended by the World  
55 Health Organization is prevalence of a clinical sign of active (inflammatory) trachoma:  
56 trachomatous inflammation—follicular. However, this indicator has several drawbacks. Policy-  
57 makers are considering the utility of a number of complementary indicators, including  
58 conjunctival photography and tests for infection and serology.

59 We sought the opinions of different stakeholders to determine the acceptability and feasibility of  
60 complementary indicators for use in trachoma programs. In Tanzania, we undertook focus group  
61 discussions with community members and in-depth interviews with public health practitioners.  
62 We also conducted an online survey of global stakeholders. We found that all the proposed test  
63 types were acceptable to stakeholders in Tanzania; common themes included not wanting undue  
64 discomfort and a preference for test types perceived to be accurate. Community education and  
65 building trust was deemed critical. From the online survey, the most agreed-upon barriers to  
66 implementation of each method were related to concerns about feasibility, rather than  
67 acceptability.

## 68 Introduction

69 Trachoma is a neglected tropical disease (NTD) that causes blindness as a result of  
70 repeated conjunctival infection by the bacterium *Chlamydia trachomatis* (*Ct*).<sup>1</sup> Transmission  
71 intensity is estimated, for programmatic decision-making, via field grading of the clinical sign  
72 trachomatous inflammation—follicular (TF). A major goal of the World Health Organization  
73 (WHO) Alliance for the Global Elimination of Trachoma is the reduction of TF prevalence in 1–  
74 9-year-olds (TF<sub>1–9</sub>) to <5% in all formerly endemic districts worldwide, contributing to the  
75 achievement of global elimination of trachoma as a public health problem.<sup>2</sup> A key component of  
76 the WHO-recommended SAFE (surgery, antibiotics, promotion of facial cleanliness and  
77 environmental improvement) strategy that is designed to be used to achieve this target is mass  
78 drug administration (MDA) of antibiotics to clear infection. The number of MDA rounds is  
79 dependent on the category of TF<sub>1–9</sub> within an evaluation unit (generally equivalent to a district)  
80 as measured by population-based prevalence surveys<sup>3</sup> on the assumption that TF<sub>1–9</sub> is well-  
81 correlated with prevalence of *Ct* infection.

82 However, TF<sub>1–9</sub> has several limitations as the sole indicator for trachoma. First, the  
83 relationship between TF<sub>1–9</sub> and infection is not predictable,<sup>4</sup> especially post-MDA,<sup>5</sup> and the  
84 reduction in TF<sub>1–9</sub> often lags behind the reduction in *Ct* infection.<sup>6</sup> Second, conjunctival follicles  
85 (the features that lead to a diagnosis of TF) are not necessarily specific to trachoma, sometimes  
86 occurring due to other causes.<sup>7</sup> Furthermore, in areas with low prevalence of trachoma, it  
87 becomes both costlier to train field graders<sup>8</sup> and more difficult for graders to pass the inter-grader  
88 agreement test.<sup>9–11</sup>

89 There has been ongoing research into indicators that could be alternative or  
90 complementary to TF, including conjunctival photography,<sup>12</sup> tests for ocular *Ct* infection,<sup>5</sup> and  
91 serology to assess an individual's previous exposure to *Ct* infection by detecting antibodies to the

92 pathogen.<sup>13</sup> It is important to note that each of these indicators measures a different signal:  
93 clinical grading (both field-based and through photography) measures signs of inflammation,  
94 infection tests are a direct measure of current infection with *Ct*, and serology measures a history  
95 of previous exposure to the pathogen. Therefore, each of these indicators could provide different  
96 measures of the public-health threat caused by trachoma; i.e., indicators should be considered  
97 "complementary" rather than "alternative" to each other.

98         Following a WHO meeting in 2016 reviewing existing data, it was concluded that there  
99 was insufficient evidence to support routine use of *Ct* infection or serology tests to inform  
100 trachoma elimination programs.<sup>14</sup> However, a WHO informal workshop in December 2021  
101 supported the use of age-stratified data on *Ct* infection and serological data on the presence of  
102 anti-*Ct* antibodies for decision-making in districts where TF<sub>1-9</sub> either remains at or above the 5%  
103 elimination threshold at the second impact survey (districts with "persistent" TF) following  
104 MDA interventions, or falls <5% but subsequently returns to ≥5% during the surveillance period  
105 after cessation of MDA (districts with "recrudescence" TF).<sup>15</sup>

106         WHO is now producing guidelines on the use of serology in trachoma elimination  
107 programs. As part of the guideline development process, the Guideline Development Group must  
108 consider both the acceptability of the proposed intervention and the values and preferences of the  
109 people affected by the recommendations, which will partially determine the strength of any  
110 recommendations.<sup>16</sup> Research to date has indicated the value complementary indicators could  
111 have for trachoma surveillance purposes. A literature review assessing post-elimination  
112 surveillance systems for multiple diseases, including trachoma, suggested that opportunities for  
113 inclusion of infection testing and serological markers in trachoma elimination settings continue  
114 to be explored.<sup>17</sup> A 2019 survey of stakeholders found that the top-cited barrier to trachoma

115 eradication is inadequate surveillance tools and systems to monitor for recrudescence.<sup>18</sup> While  
116 eradication is a different goal than elimination as a public health problem, the need for practical  
117 strategies to measure trachoma after the cessation of MDA remains.

118 With 2030 as the target for global elimination of trachoma as a public health problem,<sup>19</sup> a  
119 better understanding of the acceptability and feasibility of complementary indicators for  
120 trachoma detection by all stakeholders is urgently needed. In this study, we aimed to determine  
121 the opinion of a wide variety of stakeholders through a mixed-methods approach: a qualitative  
122 study of community members and public health practitioners in Tanzania, followed by a  
123 quantitative online global survey of stakeholders.

## 124 **Methods**

### 125 **Qualitative study in Tanzania**

#### 126 **Ethics**

127 The qualitative study was approved by the London School of Hygiene & Tropical Medicine  
128 Research Ethics Committee (Ref: 28028), the Task Force for Global Health ethical review body,  
129 and Tanzania's National Institute of Medical Research (Ref: NIMR/HQ/R.8a/Vol.IX/4123).  
130 Work was conducted in collaboration with Tanzania's health ministry through the National NTD  
131 Control Programme, region- and district-level health departments, and village leaders. Written,  
132 informed consent was obtained from all participants prior to their inclusion by trained research  
133 assistants fluent in the local languages (Swahili and/or Maa) with an impartial witness present for  
134 illiterate participants. Permission to record the focus group discussions (FGDs) and in-depth  
135 interviews (IDIs) and publish quotes was obtained at enrollment.

#### 136 **Setting/Sampling**

137 Tanzania was chosen based on the support of its health ministry, history and strength of its  
138 trachoma program, presence of districts with persistent and recrudescence TF as well as districts

139 having met the elimination threshold, and access to the "Maasai corridor", an area spanning the  
140 Kenya-Tanzania border with high levels of persistent and recrudescant TF among pastoralists  
141 including the Maasai ethnic group. FGDs with community members were conducted in four  
142 districts in Tanzania, consisting of two districts with  $TF_{1-9} < 5\%$  and two with  $TF_{1-9} \geq 5\%$  at most  
143 recent survey, chosen to be representative of pre- and post-elimination settings. Districts were  
144 chosen in three selected regions (Dodoma, Singida, and Arusha) to ensure a diversity of  
145 trachoma program experience, geographic location, and ethnic group. The current  $TF_{1-9}$  category  
146 in Tanzania and the four selected districts are shown in Figure 1. Within each chosen district,  
147 two villages were randomly selected for the FGDs by assembling a list of all villages in each  
148 district, assigning each village a random number, and selecting the two villages with the lowest  
149 randomly generated numbers.

150 *Figure 1: Map of the four districts selected for the study and their current trachomatous*  
151 *inflammation—follicular (TF) prevalence category in children 1–9-years-old, Tanzania. The*  
152 *boundaries and names shown and the designations used on this map do not imply the expression*  
153 *of any opinion whatsoever on the part of the authors, or the institutions with which they are*  
154 *affiliated, concerning the legal status of any country, territory, city or area or of its authorities,*  
155 *or concerning the delimitation of its frontiers or boundaries. Prevalence map source: Trachoma*  
156 *Atlas.*<sup>20</sup>

157

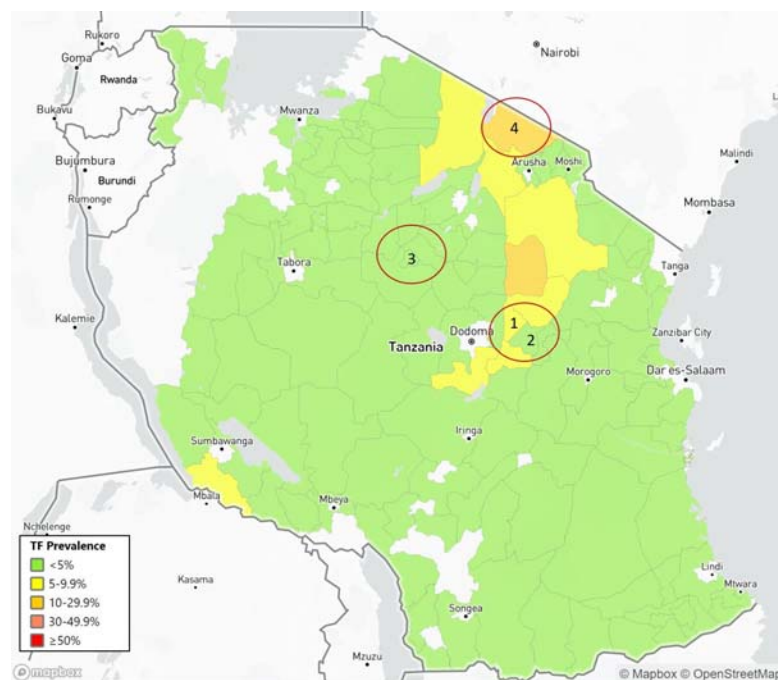

159 For the FGDs, community members aged 18–60 years who had experience caring for children  
160 were eligible to participate. Participants were identified using a snowball sampling approach,<sup>21</sup>  
161 with index participants chosen by the village leader. Snowball sampling continued until the  
162 target group size (n=10) for each FGD was reached. Separate FGDs were held with men and  
163 women.

164 IDIs were conducted with public health practitioners in Tanzania. We sought interviews with a  
165 wide variety of public health practitioners, including laboratory personnel, NTD program  
166 officers, and non-governmental organization (NGO) program staff at all levels. Participants were



167 selected based on experience working in NTD programs and their availability, with a target of 2–  
168 3 respondents for each of the three regions selected for FGDs, plus practitioners at the national  
169 level who were based in Dodoma.

#### 170 Data collection

171 FGDs and IDIs were conducted by trained research assistants in the participants' preferred  
172 language using pre-designed topic guides (Supplemental File 1), exploring themes such as  
173 previous experience with each of the test types: TF status via field grading and photography,  
174 infection testing, and serology, as well as (for community members) thoughts about the different  
175 sample collection methods: field grading, conjunctival photography, eye swabs, and dried blood  
176 spots, and (for public health practitioners) thoughts about the feasibility of each test type. In the  
177 FGDs, visual aids were used to help participants understand the different sample collection  
178 methods. Sessions were recorded using an electronic audio recorder, transcribed by a native  
179 speaker and then translated by them into English. Translations were checked for accuracy by the  
180 researcher who carried out data collection.

#### 181 Data analysis

182 Transcripts were entered into the qualitative data management software Nvivo<sup>22</sup> and coded based  
183 on both an *a priori* list of codes pertaining to each test type (Supplemental File 2) as well as  
184 broader emergent themes. The framework method for content analysis<sup>23</sup> was used to chart data  
185 into a framework matrix. For the FGDs, comparative analysis was done to compare responses  
186 between communities based on gender and setting ( $TF_{1-9} \geq 5\%$  or  $TF_{1-9} < 5\%$ ). The coding  
187 framework and analysis plan were reviewed by a second researcher prior to finalization of  
188 analysis. For the IDIs, responses pertaining to strengths and barriers for each of the sample types  
189 were used to formulate the stakeholder survey questionnaire.

## 190 **Quantitative survey of stakeholders**

### 191 **Ethics**

192 The quantitative survey was approved by the London School of Hygiene & Tropical Medicine  
193 Research Ethics Committee (Ref: 28589) and the Task Force for Global Health ethical review  
194 body. Informed consent was obtained electronically in the preferred language of the participant,  
195 from the four languages available: English, Spanish, French, and Portuguese. All questions  
196 (other than consent) were optional, and the survey responses were anonymous. At the end of the  
197 survey window, survey data were downloaded from SurveyMonkey<sup>24</sup> prior to deletion of the  
198 survey and data from the platform.

### 199 **Setting/sampling**

200 Stakeholders working in trachoma, including national program coordinators or other national  
201 program staff, members of NGOs, donor organizations, and academic organizations were asked  
202 to participate in an online survey to assess their agreement with the strengths and barriers to each  
203 test type identified by the IDIs with Tanzanian public health practitioners. Stakeholders were  
204 required to be over the age of 18 years. A list of email addresses of stakeholders meeting these  
205 inclusion criteria was assembled using publicly available sources, such as organizational  
206 websites, publications, and meeting reports with participant lists. Snowball sampling was  
207 employed by asking key members of partner organizations to recommend additional  
208 stakeholders. We solicited responses from as many people as possible who met our criteria.

### 209 **Data collection**

210 The online survey began during the annual meeting of the WHO Alliance for the Global  
211 Elimination of Trachoma by 2020 (GET2020) held in Istanbul, Türkiye, in April 2023. The  
212 GET2020 meeting convenes a variety of stakeholders; representatives from all trachoma-  
213 endemic, formerly-endemic, and suspected-endemic countries are invited, as well as members of  
214 related NGOs and academic or research organizations. The survey was hosted on

215 SurveyMonkey.<sup>24</sup> A link to the survey was available via email sent to the previously assembled  
216 list of email addresses, through advertisements at the GET2020 meeting, and through a post on  
217 the social media platform X (formerly known as Twitter) from EMHE. Prior to the start of the  
218 survey window, the survey was piloted with colleagues with expertise in trachoma and online  
219 survey forms to gain feedback on the questionnaire and the ease of using the survey platform.  
220 The questionnaire (Supplemental File 3) included questions on the participant's age group,  
221 gender identity, organizational role, primary country/countries of trachoma work, level of  
222 agreement with the importance of various perceived barriers to implementation at the program  
223 level and strengths for different complementary indicators on a 5-point Likert scale (with the  
224 options of: Strongly Agree, Agree, Neither Agree nor Disagree, Disagree, Strongly Disagree),  
225 and identification of further knowledge gaps remaining, entered as free text, that may prevent  
226 implementation of these indicators for trachoma surveillance. The strengths and barriers  
227 presented in the questionnaire were obtained from the responses of IDI participants.

## 228 Data analysis

229 Descriptive analysis was performed using R.<sup>25</sup> Since the total target population is unknown (due  
230 to the survey being publicly available via an online link) no response rate could be calculated.  
231 Frequency tables were created to determine the percent of respondents that strongly agreed or  
232 agreed with, neither agreed nor disagreed with, and disagreed or strongly disagreed with each  
233 proposed strength and barrier. The "strongly agree" and "agree" responses were combined and  
234 the "strongly disagree" and "disagree" responses were combined to determine the percent of  
235 respondents who agreed or disagreed with a statement, respectively. In order to determine if  
236 responses pertaining to community acceptability differed between national program staff and  
237 other stakeholders, responses pertaining to these barriers were analyzed on the basis of the  
238 participant's organizational and personal role (country staff, as defined as a respondent whose

239 organizational role was "Government" and personal role was "Programmatic/Implementation",  
240 compared to all other stakeholders) by calculating the median and interquartile range (IQR) of  
241 responses to these questions. The 2-tailed Wilcoxon rank-sum test was used to calculate p-values  
242 comparing the responses of the two groups. Key knowledge gaps entered by respondents as free  
243 text responses were cleaned and aggregated.

## 244 Results

### 245 **Qualitative study in Tanzania**

246 Data collection took place in Tanzania from October to November 2022. A total of 160  
247 community members participated in 16 FGDs, with ten people per FGD. The reported population  
248 of selected villages ranged from roughly 1,100 to 5,400. Equal numbers of men and women  
249 participated. Fourteen FGDs were conducted in Swahili and two were conducted in Maa. A total  
250 of 11 public health practitioners participated in IDIs. The roles of participants included current  
251 and former country-level staff, NGO staff, lab technicians, regional NTD coordinators, and one  
252 healthcare worker. The framework matrix used to assess community responses for each test type  
253 by gender and setting is provided as Supplemental File 4.

### 254 TF field grading

255 According to community members in Tanzania, key advantages of field grading of TF were the  
256 familiarity of this method (particularly noted in FGDs with women), the lack of pain or adverse  
257 consequences from this method, and the ability to receive results immediately. A perceived  
258 disadvantage of field grading of TF, mentioned in half of the FGDs, was the possibility of short-  
259 term discomfort or adverse consequences that may be caused by the strong light of torches used  
260 as part of the field grading process:

261 "I think that [the] examination method of being graded with torches causes effects. For example,  
262 eyes turn red and keeps on shedding a lot of tears after a certain period of time. I recommend that  
263 they should innovate a new method for trachoma examination." (31–35-year-old woman, TF<sub>1-9</sub>  
264 <5% district)

265 In the IDIs, most of the public health practitioners who provided advantages of field grading of  
266 TF mentioned that this method is both familiar and acceptable to communities, which agrees  
267 with community feedback from the FGDs. Very few IDIs mentioned any disadvantages with  
268 field grading of TF, and most disadvantages related to general concerns with needing to train  
269 staff to conduct the examination, which is not necessarily specific to this method. None of the  
270 IDIs mentioned the possibility that communities may dislike this method due to fear of adverse  
271 consequences from the torch used as part of the examination.

#### 272 Conjunctival photography

273 A majority of FGDs mentioned that a key advantage of conjunctival photography is a perceived  
274 increase in the accuracy of grading via photo versus field grading due to the ability for graders to  
275 have ample time:

276 "It is possible that [TF field grading] won't be conducted as it is required because you are in [a]  
277 hurry but when you are taking a photo it is a good thing because a person who will examine that  
278 photo will have plenty of time to do that." (26–30-year-old man, TF<sub>1-9</sub> <5% district)

279 Other advantages of conjunctival photography mentioned by FGD participants were the  
280 familiarity with the concept of imaging for diagnostics, and the lack of pain and adverse  
281 consequences from this method. Each of these advantages was particularly often noted in the

282 FGDs with men. A majority of FGDs (particularly with men) mentioned that a key disadvantage  
283 is a fear of long-term adverse consequences caused by the photo flash:

284 “Some people are worried that when you are photographed you will go blind or your eye will be  
285 destroyed.” (46–50-year-old man, TF<sub>1-9</sub> <5% district)

286 Several FGDs (particularly those with men) also indicated a belief that conjunctival photography  
287 is not as accurate as other methods:

288 “A photo is not enough; we would like to get another examination method because the camera  
289 won’t show the disease that I have in my eyes or in my eyelid clearly.” (31–35-year-old woman,  
290 TF<sub>1-9</sub> <5% district)

291 None of the FGD participants mentioned that they had concerns related to confidentiality, usage  
292 of the photos, or the potential identifiability of photos taken.

293 In the IDIs, none of the respondents mentioned a high level of community acceptability of  
294 conjunctival photography as a specific strength of this method. Several IDI participants  
295 mentioned that community fears related to flash photography causing adverse consequences and  
296 mistrust that the entire face would be photographed (leading to concerns by community members  
297 around the confidentiality of their and their children’s images) may be potential barriers to this  
298 method. Several mentioned that education would be needed in order for communities to  
299 participate:

300 "The most important thing is to give education and sensitization. If you will just tell a parent that  
301 you want to take a photo, he/she might think you have [a] hidden agenda with the child."  
302 (Program coordinator)

303 In terms of feasibility, while there was an acknowledgement from a few IDI participants that the  
304 fragility of camera equipment may be a concern in the field, most indicated that this would not  
305 be a true barrier to implementation, especially given the benefits of conjunctival photography.

### 306 Eye swabs

307 A majority of FGDs mentioned increased perceived test accuracy (especially compared to field  
308 or photo grading) as a key advantage of tests for ocular *Ct* infection. Half of FGDs (particularly  
309 those with men) indicated that an advantage of the test for ocular *Ct* infection is that this method  
310 is perceived as modern, high-tech, "professional", and/or legitimate (as it is approved by an  
311 authorizing body prior to use).

312 Most FGDs (particularly those with men) mentioned that a key disadvantage of eye swabs is a  
313 fear of long-term adverse consequences from the test procedure:

314 "I won't agree with the use of eye swab method, I will even tell my family members not to  
315 participate in that method because it has effects, it may leave you with a wound in the eye." (31-  
316 35-year-old-man,  $TF_{1-9} \geq 5\%$  district)

317 In addition, half of FGDs (particularly those with men) mentioned a fear of pain from the test  
318 procedure, especially with regard to children. Several FGDs indicated that the complicated  
319 nature of the test (with the need for sample collection, storage, and testing) may cause test errors  
320 or failures.

321 From the IDIs, many respondents said that eye swabs would be acceptable to communities only  
322 with proper education as to the risks and benefits of participation. Some IDI respondents said  
323 that training would be needed in order for the sample collector to not harm the eyes of

324 participants, with the importance of this being two-fold: to minimize harm to participants and  
325 increase participation rates:

326 "...if the trained personnel will not be careful when taking [the] sample, she/he can harm a child  
327 and these children can inform each other that it hurts when they are taking [the] sample and this  
328 will make all children not participate in [the] examination." (Lab technician)

329 In terms of feasibility, several IDI respondents said that a desire for samples to be processed at  
330 the local level (in order to increase turn-around time) is likely unfeasible due to a lack of current  
331 lab capacity at the district level. This was mentioned by both public health practitioners at the  
332 national and lower levels of administration.

### 333 Blood spots

334 Key advantages to blood spots mentioned in a majority of FGDs were the familiarity with blood  
335 testing and (particularly among FGDs with women) the lack of pain or adverse consequences  
336 from the testing procedure. Half of FGDs (particularly those with men) indicated that the high  
337 perceived accuracy of the results is an advantage to this method:

338 "There are many diseases that cannot be seen easily but when you take a blood sample to the lab  
339 it will be a perfect solution." (51–55-year-old man, TF<sub>1-9</sub> <5% district)

340 Several FGDs mentioned that a disadvantage to blood spots is a lack of trust by participants that  
341 the sample will be used only to test trachoma; with fears especially around testing for HIV or  
342 other sexually transmitted infections without participants' consent. Many FGDs with participants  
343 who mentioned this fear indicated that it could be mitigated with community education, as  
344 community members had simply not been made aware that the presence of antibodies to  
345 trachoma could be tested for via blood spots prior to participating in the FGDs.



346 One FGD among the Maasai ethnic group mentioned a general dislike of blood testing in  
347 particular:

348 “We, as Maasai people don’t like blood testing most of the time. For example, HIV and TB are  
349 prevalent in Maasai society and when people are asked to test using blood samples, they run  
350 away.” (46–50-year-old woman, TF<sub>1-9</sub> ≥5% district)

351 When IDI participants mentioned advantages of blood spots, community acceptability was not  
352 often specifically mentioned as a key strength of this method. When community acceptability  
353 was mentioned, the need for education was underscored. One IDI participant mentioned the  
354 potential for distrust related to sample use (specifically related to fears around HIV testing)  
355 among community members. Some IDI participants also mentioned the potential for community  
356 acceptability issues if community participants expect on-the-spot results (as they would receive  
357 for other types of blood tests they undergo as part of routine health care, such as malaria testing),  
358 and again underscored the need for community education as to the purpose of the test in the  
359 context of trachoma programming.

360 In terms of feasibility, key strengths mentioned by IDI participants included the familiarity of  
361 blood spot collection and testing by health systems and the ability for high throughput of these  
362 sample types, although several participants mentioned a lack of lab capacity to store and test  
363 samples at a local level as a potential issue. While familiarity of blood testing by health systems  
364 was often mentioned, IDI respondents did not mention the potential for integration of trachoma  
365 monitoring into existing health systems via the use of blood spots as a specific advantage of this  
366 method.

367 When asked, the majority of FGDs had at least one participant who would hypothetically  
368 participate in each sample collection method. No qualitative difference in responses between  
369 districts with a  $TF_{1-9} \geq 5\%$  vs.  $< 5\%$  was detected (15 FGDs in districts with a  $TF_{1-9} \geq 5\%$  vs. 15  
370 FGDs in districts with a  $TF_{1-9} < 5\%$  with at least one respondent who said they would  
371 hypothetically participate in each method).

372 FGDs with men generally indicated more willingness to hypothetically participate in all of the  
373 testing methods compared to FGDs with women (16 FGDs with men vs. 14 FGDs with women  
374 with at least one respondent who said they would hypothetically participate in each method).

375 While responses from FGDs with men and women were largely quite similar, FGDs with men  
376 often mentioned the importance of perceived accuracy, a lack of adverse consequences from the  
377 testing procedure, and the benefit of tests perceived as modern or high tech as important to  
378 determining the acceptability of the different methods. FGDs with women mentioned the  
379 importance of test familiarity and a lack of undue discomfort or harm from participating in the  
380 test procedure as important to determining the acceptability of the different methods.

### 381 **Quantitative survey of stakeholders**

382 The online survey was live from April 24 to May 31, 2023. Responses from 98 people who  
383 consented to participate were received. Respondents reported living and working in 42 different  
384 countries and represented each trachoma-endemic WHO Region (African Region, Eastern  
385 Mediterranean Region, Region of the Americas, South-East Asia Region, and the Western  
386 Pacific Region). A majority (60%) of respondents were men. Most respondents were between the  
387 ages of 35–49 years, worked for an NGO, and worked in a programmatic/implementation role  
388 (Table 1).

389 Table 1: Self-reported demographic information of respondents to stakeholder survey

| Characteristic                | n  | %   |
|-------------------------------|----|-----|
| <b>Gender</b>                 |    |     |
| Man                           | 55 | 60% |
| Woman                         | 37 | 40% |
| <b>Age group</b>              |    |     |
| 18–34 years                   | 5  | 5%  |
| 35–49 years                   | 45 | 48% |
| 50–64 years                   | 32 | 34% |
| 65 +                          | 11 | 12% |
| <b>Organizational Role</b>    |    |     |
| Government                    | 20 | 22% |
| Non-governmental organization | 46 | 50% |
| University or research        | 22 | 24% |
| Other                         | 4  | 4%  |
| <b>Personal Role</b>          |    |     |
| Academic/Research             | 24 | 26% |
| Programmatic/Implementation   | 57 | 61% |
| Other                         | 12 | 13% |

390

391 Eighty-one respondents answered questions beyond providing demographic information. Table 2  
 392 includes results for questions related to respondents' agreement with strengths and barriers to  
 393 each indicator. Almost all (79, 98%) of respondents agreed that TF grading being WHO-  
 394 recommended for diagnosing trachoma is a strength of field grading of TF. Besides this, the  
 395 strengths of field grading of TF respondents most agreed with were that TF grading is familiar  
 396 (71, 88%), acceptable to communities (69, 85%), harmless/does not cause side effects (66, 81%),  
 397 and that participants are provided results on-the-spot (66, 81%). The most agreed-upon barrier  
 398 indicated for field grading of TF was that it is a subjective measure that is prone to human error  
 399 (65, 80%).

400 Table 2: Stakeholder Survey – Frequency of responses to strength/barrier survey items taken  
 401 from in-depth interview responses from public health practitioners in Tanzania

|                    |            |
|--------------------|------------|
| <b>Survey item</b> | <b>3-w</b> |
|--------------------|------------|

|                                 |                                                                                                                           | Total respondents | Strongly agree or agree n (%) |
|---------------------------------|---------------------------------------------------------------------------------------------------------------------------|-------------------|-------------------------------|
| <b>Field grading of TF</b>      |                                                                                                                           |                   |                               |
| Strength                        | TF grading is recommended by the World Health Organization for diagnosing trachoma in communities.                        | 81                | 79 (98)                       |
|                                 | TF grading is a familiar method.                                                                                          | 81                | 71 (88)                       |
|                                 | TF grading is acceptable to communities.                                                                                  | 81                | 69 (85)                       |
|                                 | TF grading is harmless/does not cause side effects.                                                                       | 81                | 66 (81)                       |
|                                 | TF grading provides results on the spot.                                                                                  | 81                | 66 (81)                       |
|                                 | TF grading is accurate.                                                                                                   | 79                | 42 (53)                       |
| Barrier                         | TF grading is subjective and prone to human error.                                                                        | 81                | 65 (80)                       |
|                                 | TF grading is not as sensitive or specific as other methods.                                                              | 81                | 50 (62)                       |
|                                 | Everting the eyes of children can be difficult.                                                                           | 80                | 49 (61)                       |
| <b>Conjunctival photography</b> |                                                                                                                           |                   |                               |
| Strength                        | Multiple graders can grade the same photo, which will increase accuracy and help determine the status of "edge cases."    | 73                | 61 (84)                       |
|                                 | Increased costs of conjunctival photography will be less than those for eye swabs or blood spots.                         | 73                | 41 (56)                       |
|                                 | The potential to use Artificial Intelligence to grade photos will provide more accurate results than field grading of TF. | 71                | 34 (48)                       |
|                                 | The photo can be used to determine the presence or absence of other eye diseases.                                         | 73                | 30 (41)                       |
|                                 | Conjunctival photography is easy to implement.                                                                            | 72                | 29 (40)                       |
|                                 | Grading the photo away from the field will reduce field time compared to TF grading.                                      | 73                | 24 (33)                       |
|                                 | Conjunctival photography is more accurate than field grading of TF.                                                       | 73                | 21 (29)                       |
|                                 | Conjunctival photography is more sensitive than field grading of TF.                                                      | 72                | 18 (25)                       |
| Barrier                         | Increased costs compared to TF grading due to need for camera equipment.                                                  | 72                | 43 (60)                       |
|                                 | Increased costs compared to TF grading due to increased personnel training/time needed.                                   | 72                | 41 (57)                       |
|                                 | Community participation may be low if participants do not receive individual results.                                     | 71                | 39 (55)                       |
|                                 | Community participation may be low due to fear/mistrust of having photo taken.                                            | 72                | 38 (53)                       |
|                                 | Conjunctival photography grading is subjective and prone to human error.                                                  | 72                | 36 (50)                       |
|                                 | Community participation may be low due to fear of side effects due to photo flash.                                        | 72                | 27 (38)                       |
|                                 | Conjunctival photography is perceived as less accurate compared to other methods.                                         | 73                | 18 (25)                       |
| <b>Infection testing</b>        |                                                                                                                           |                   |                               |
| Strength                        | Infection testing can detect pre-symptomatic trachoma.                                                                    | 68                | 55 (81)                       |
|                                 | Eye swabs can be tested for multiple pathogens/diseases.                                                                  | 70                | 55 (79)                       |
|                                 | Infection testing is more accurate than field grading of TF at identifying trachoma.                                      | 70                | 54 (77)                       |
|                                 | Infection testing is more accurate than other methods at identifying trachoma.                                            | 70                | 52 (74)                       |
|                                 | Eye swabs/infection testing are acceptable to communities as long as education is provided.                               | 69                | 51 (74)                       |
|                                 | Eye swabs have a low chance of causing side effects.                                                                      | 70                | 51 (73)                       |

|          |                                                                                                          |    |         |
|----------|----------------------------------------------------------------------------------------------------------|----|---------|
| Barrier  | Extra work needed to plan for logistics of field collection and sample processing.                       | 71 | 68 (96) |
|          | Desire for samples to be tested by nearest lab may be a challenge.                                       | 71 | 63 (89) |
|          | Increased costs compared to TF field grading due to storage of samples.                                  | 71 | 62 (87) |
|          | Increased costs compared to TF field grading due to equipment needed.                                    | 71 | 62 (87) |
|          | Requirement for cold chain a challenge due to need for stable electricity.                               | 70 | 61 (87) |
|          | Increased costs compared to TF field grading due to increased personnel training/time needed.            | 70 | 48 (69) |
|          | Poorly trained personnel might cause damage to eyes of participants.                                     | 71 | 40 (56) |
|          | Community participation may be low if participants do not receive individual results.                    | 70 | 36 (51) |
|          | Community participation may be low due to fear of sample collection process or side effects.             | 70 | 34 (49) |
|          | Infection testing may be less accurate than TF field grading due to time between collection and testing. | 71 | 18 (25) |
|          | <b>Serology</b>                                                                                          |    |         |
| Strength | Blood spots (for other diseases) are familiar to health systems.                                         | 66 | 51 (77) |
|          | Blood spots are easy to collect.                                                                         | 66 | 47 (71) |
|          | Blood spots are easier to transport and store than eye swabs.                                            | 64 | 42 (66) |
|          | Blood spots (for other diseases) are familiar and acceptable to community members.                       | 66 | 39 (59) |
|          | Serological testing is more accurate than TF grading at identifying trachoma.                            | 66 | 29 (44) |
|          | Serological testing is fast.                                                                             | 65 | 26 (40) |
|          | Serological testing can detect pre-symptomatic trachoma.                                                 | 66 | 21 (32) |
| Barrier  | Extra work needed to plan for logistics of field collection and sample processing.                       | 66 | 58 (88) |
|          | Increased costs compared to TF field grading due to equipment needed.                                    | 66 | 55 (83) |
|          | Lack of current lab capacity.                                                                            | 65 | 52 (80) |
|          | Increased costs compared to TF field grading due to increased personnel training/time needed.            | 66 | 45 (68) |
|          | Increased costs due to storage of samples.                                                               | 65 | 41 (63) |
|          | Increased danger of working with blood/risk of medical errors, compared to other diagnostics.            | 66 | 38 (58) |
|          | Field conditions challenging, samples may be destroyed in the field.                                     | 66 | 35 (53) |
|          | Community participation may be low due to misunderstanding or mistrust of test purpose.                  | 66 | 35 (53) |
|          | Community participation may be low if participants do not receive individual results.                    | 64 | 31 (48) |
|          | Community participation may be low due to fear of finger pricking.                                       | 66 | 28 (42) |

402 TF = trachomatous inflammation—follicular

403 The most agreed-upon strength for conjunctival photography was that multiple graders can grade  
 404 the same photo, increasing accuracy and helping to determine the status of borderline cases (61,  
 405 84%). In contrast, a third of respondents (24, 33%) said that a strength of conjunctival  
 406 photography is that the ability to grade the photo away from the field would reduce field time.

407 The most agreed-upon barrier to implementation of conjunctival photography is that it would  
408 increase the costs compared to TF field grading due to the need for camera equipment (43, 60%),  
409 followed closely by increased costs due to the need for increased personnel training and time (41,  
410 57%).

411 For infection testing, the most agreed-upon strength was this indicator's ability to detect infection  
412 in the absence of clinical signs (55, 81%). The most agreed-upon barriers for this indicator all  
413 pertain to challenges around the feasibility of implementation, including the extra work required  
414 to plan for logistics of field collection and sample processing (68, 96%), the challenge posed by a  
415 desire for samples to be tested by the nearest lab (63, 89%), increased costs compared to field  
416 grading of TF posed by the need to store samples (62, 87%) and purchase needed equipment (62,  
417 87%), as well as the challenge posed by the requirement for maintaining a cold chain (61, 87%).  
418 In contrast to items about feasibility, there were lower levels of agreement with barriers related  
419 to low community participation, due either to a lack of receiving individual results (36, 51%), or  
420 fear of the sample collection process or side effects (34, 49%).

421 The most agreed-with strengths of serology include the familiarity of health systems with blood  
422 spots (for other diseases) (51, 77%), as well as an acknowledgement that blood spots are both  
423 easy to collect (47, 71%), and easier to transport and store compared to eye swabs (42, 66%).

424 The most agreed-with barriers to the implementation of serology included the extra work needed  
425 to plan for the logistics of field collection and sample processing (58, 88%), the increased costs  
426 compared to TF field grading due to equipment needed (55, 83%), and the lack of current lab  
427 capacity (52, 80%). Less than half of respondents agreed that community participation may be  
428 low if participants do not receive individual test results (31, 48%) or due to a fear of finger  
429 pricking (28, 42%).

430 The results of the comparison of responses to barriers related to community acceptability by  
 431 country staff vs. other stakeholders are presented in Table 3. (In this analysis, a higher score  
 432 indicates a stronger level of agreement that the statement is a barrier to implementation of the  
 433 indicator.) Country staff had a higher agreement compared to other stakeholders that barriers  
 434 around community acceptability of conjunctival photography would pose a challenge to  
 435 implementation of this indicator, while other stakeholders had higher agreement that barriers  
 436 related to community acceptability of serology would pose a challenge to implementation of this  
 437 indicator. However, none of the comparisons were significant at an alpha of 0.05.

438 Table 3: Stakeholder agreement with proposed barriers of complementary indicators to  
 439 trachomatous inflammation—follicular detection by affiliation (country staff vs. other  
 440 stakeholders)

| Barrier                                                                                      | Country staff <sup>a</sup><br>(n=14) | Other stakeholders<br>(n=59) <sup>b</sup> | p value <sup>c</sup> |
|----------------------------------------------------------------------------------------------|--------------------------------------|-------------------------------------------|----------------------|
|                                                                                              | median (IQR)                         | median (IQR)                              |                      |
| <b>Conjunctival photography</b>                                                              |                                      |                                           |                      |
| Community participation may be low due to fear/mistrust of having photo taken.               | 4.0 (3.6–4.4)                        | 3.0 (2.0–4.0)                             | 0.13                 |
| Community participation may be low due to fear of side effects due to photo flash.           | 3.5 (2.5–4.5)                        | 3.0 (2.0–4.0)                             | 0.46                 |
| Community participation may be low if participants do not receive individual results.        | 4.0 (3.5–4.5)                        | 4.0 (3.5–4.5)                             | 0.37                 |
| <b>Infection testing</b>                                                                     |                                      |                                           |                      |
| Community participation may be low due to fear of sample collection process or side effects. | 3.0 (2.0–4.0)                        | 3.5 (2.5–4.5)                             | 0.70                 |
| Community participation may be low if participants do not receive individual results.        | 4.0 (3.4–4.6)                        | 3.5 (3.0–4.0)                             | 0.67                 |
| <b>Serology</b>                                                                              |                                      |                                           |                      |
| Community participation may be low due to fear of finger pricking.                           | 2.0 (1.1–2.9)                        | 3.0 (2.0–4.0)                             | 0.08                 |
| Community participation may be low due to misunderstanding or mistrust of test purpose.      | 3.0 (2.1–3.9)                        | 4.0 (3.5–4.5)                             | 0.38                 |

|                                                                                       |               |               |      |
|---------------------------------------------------------------------------------------|---------------|---------------|------|
| Community participation may be low if participants do not receive individual results. | 2.5 (1.6–3.4) | 4.0 (3.0–5.0) | 0.14 |
|---------------------------------------------------------------------------------------|---------------|---------------|------|

IQR = Interquartile range, a: organizational role = "Government" and personal role = "Programmatic/Implementation", b: not all respondents answered every question, c: as measured by a 2-tailed Wilcoxon-rank-sum test.

Note: A higher score indicates a stronger level of agreement that the statement is a barrier to implementation of the indicator.

441

442 Key knowledge gaps entered by respondents are presented as Supplemental File 5. Categories of  
443 knowledge gaps identified include: setting and interpreting meaningful thresholds using  
444 complementary indicators, understanding test characteristics (e.g. sensitivity and specificity) of  
445 each indicator, refining survey design to allow the inclusion of complementary indicators,  
446 interpreting serological data, understanding clinical signs and the progression of disease,  
447 integrating complementary indicators for trachoma into existing systems, understanding the  
448 acceptability and feasibility of complementary indicators, and identifying and mitigating  
449 potential issues with training and lab quality assurance.

## 450 Discussion

451 From the FGDs, we found that each diagnostic method explored was generally acceptable  
452 to community members in Tanzania, with key themes such as not wanting to suffer harm from  
453 the diagnostic process and the importance of (perceived) test accuracy apparent. From the IDIs  
454 with public health practitioners in Tanzania, we found that these health workers also considered  
455 each diagnostic method to be acceptable to community members, as long as appropriate  
456 education on the risks and benefits of participation is provided.

457 When global stakeholders were asked to indicate their agreement that given barriers  
458 would hinder implementation of complementary indicators, the highest agreement items tended  
459 to be those around feasibility, rather than acceptability. The highest consensus of any strength or  
460 barrier listed was agreement that the WHO recommendation for field grading of TF is a benefit



461 of this method, with 98% of respondents in agreement. When results around community  
462 acceptability were stratified based on country staff vs. other stakeholder, no statistically  
463 significant differences were found, indicating broad agreement among respondents in the  
464 stakeholder survey that community acceptability of each method is unlikely to hinder  
465 implementation. This was concordant with the findings from community members in Tanzania,  
466 who rated each test type generally acceptable.

467 A study in the Bijagós Islands, Guinea Bissau on different diagnostic tests and sample  
468 types for trachoma surveillance (including clinical exams, eye swabs, and finger-prick blood  
469 samples) reported that although all the studied test types were generally acceptable, there was a  
470 preference among community members for laboratory-based testing; these results were  
471 considered more accurate than clinical examination.<sup>26</sup> Additionally, sample types that did not  
472 require close proximity to the eye (i.e., finger-prick blood samples) were preferred.<sup>26</sup> Our study  
473 had similar results, with participants noting a perception of improved accuracy from laboratory-  
474 based methods, although expressing some unease with the eye swab and blood spot procedures,  
475 especially with regards to children. This similarity in findings is reassuring given the different  
476 locations and population types, indicating some generalizability of the results. Considered in  
477 parallel, these results suggest that acceptability would not be a widespread barrier to  
478 implementation.

479 Different studies have shown varying levels of acceptability of blood collection. Research  
480 in sub-Saharan Africa has shown that collecting blood or other bodily samples from individuals  
481 can be challenging, with fears related to blood-stealing and intentional spreading of disease  
482 concerning public health interventions documented since colonial times.<sup>27</sup> Individual reticence to  
483 participation in a trial in The Gambia involving blood collection via finger stick for malaria

484 screening was linked to fear of blood-taking due to depletion of life force and fear of  
485 exploitation.<sup>28</sup> In contrast, a study on the feasibility of bloodspot collection for the surveillance  
486 of human African trypanosomiasis in the Democratic Republic of the Congo found that refusal to  
487 participate in bloodspot collection was rare, although reasons for non-participation were not  
488 analysed.<sup>29</sup> Finger-prick blood samples are routinely taken for malaria testing,<sup>30</sup> which is  
489 commonplace in most places that are also trachoma-endemic.<sup>31</sup> Our community member  
490 participants expressed broad acceptance of blood spots, with two notable exceptions.

491 First, among the Maasai ethnic group one FGD (out of four) noted a general cultural  
492 dislike of blood-giving. This may be related to a noted lack of trust of non-Maasai visitors, an  
493 incomplete understanding of the purpose of interventions, and a perception of misalignment  
494 between community and government priorities, which has eroded trust in this institution.<sup>32</sup> A  
495 study conducted in the Sinya Ward (a Maasai community in Longido District) found that, while  
496 this community does perceive trachoma as a problem,<sup>33</sup> competing priorities can make it difficult  
497 to participate in trachoma-related interventions, such as MDA.<sup>32</sup> A lack of sensitization around  
498 MDA has previously been associated with poor uptake of azithromycin in this area,<sup>34</sup>  
499 underscoring the need for effective messaging on health programs in these and other under-  
500 served communities, which, as we near trachoma elimination, may represent the last foci of TF.

501 Second, concerns explicitly about the purpose of blood tests were raised (among a variety  
502 of ethnic groups), with specific fears mentioned around testing for HIV without the participants'  
503 consent. These fears were relayed both by community participants themselves and recognized as  
504 a potential reason for low community acceptance by public health practitioners. In this regard,  
505 the familiarity and commonplace nature of blood testing is a disadvantage, as community  
506 members are aware that their blood samples could be tested for many other diseases, some of

507 which (such as HIV) still carry a level of stigma.<sup>35</sup> However, familiarity with blood spots was  
508 also perceived as an advantage of this method, both by community members, who appreciated  
509 the lack of pain or harm caused by the sample procedure, and by public health practitioners, who  
510 noted experience with sample collection, processing, and testing by an array of health systems in  
511 Tanzania.

512 While public health practitioners in Tanzania did often recognize the familiarity of blood  
513 testing (for other diseases) by health systems as an advantage of this method, our study found a  
514 lack of acknowledgement of the potential utility of serology for the integration of trachoma  
515 monitoring with other disease programs. This group also recognized that a lack of local lab  
516 capacity would make the quick processing of blood samples a challenge, which was corroborated  
517 as a barrier to implementation by global stakeholders. The Global NTD road map 2021–2030  
518 calls for concerted action to achieve integration across NTD programs and for increased  
519 investment in developing lab capacity in order to meet NTD targets.<sup>19</sup> The long-term benefit of  
520 investments in increasing and maintaining lab capacity of health systems for infection testing and  
521 serology should be underscored to stakeholders at all levels. A coordinated approach is needed to  
522 leverage the investments and achievements made to date across different disease programs,  
523 enabling the building, strengthening and maintenance of laboratory capacity and networks.<sup>36</sup>

524 Community members found conjunctival photography to be an acceptable method for  
525 trachoma diagnosis, noting a general familiarity with the concept of medical imaging and  
526 potential benefits of this method compared to field grading of TF. Another study on the  
527 acceptability of conjunctival photography among community members in Tanzania found similar  
528 sentiment around the utility of photography for grading borderline cases (contributing to greater  
529 overall accuracy), but noted an element of concern among community members regarding the

530 exposure of children to a photo flash.<sup>37</sup> However, this fear pertained only to traditional digital  
531 single-lens reflex (DSLR) cameras, compared to photography via smartphone.<sup>37</sup> In addition, our  
532 study did not find that issues around photo use and confidentiality were a concern among  
533 community members. However, these issues were recognized as potential concerns by public  
534 health practitioners in our study, as well as both community members and Tropical Data trainers  
535 in the previous Tanzanian qualitative study.<sup>37</sup> Consent materials for activities incorporating  
536 conjunctival photography for research or programmatic use should be very clear as to the risks  
537 and benefits of participating.

538         We found that generally, FGDs with men were more favorable to each of the test types  
539 compared to FGDs with women, with FGDs with men more likely to have at least one  
540 participant indicate that they would hypothetically allow the children under their care to  
541 participate in each test type compared to FGDs with women. A previous systematic review and  
542 meta-analysis on the acceptance of the COVID-19 vaccine, which included studies from each  
543 WHO region, found that male gender was associated with an increased likelihood of vaccine  
544 acceptance.<sup>38</sup> A systematic review on this topic in sub-Saharan Africa found similar results.<sup>39</sup> In  
545 terms of care-giving behavior, a multi-country questionnaire similarly found that fathers are  
546 more willing than mothers to vaccinate their children against COVID-19, possibly due to  
547 differences in risk-taking behaviors among fathers vs. mothers.<sup>40</sup> It may be advisable to target  
548 messaging around the safety of and risk of discomfort or adverse consequences from each  
549 diagnostic method specifically to women caregivers, especially as they are often the decision-  
550 makers in regards to children's healthcare.<sup>41</sup>

551         The high level of stakeholder agreement that a WHO recommendation of field grading of  
552 TF is beneficial indicates that additional WHO guidance around complementary indicators may

553 be advantageous. In informal workshops, tests for infection and serology have already been  
554 advocated for by WHO,<sup>15</sup> and the forthcoming guidelines on their use are eagerly awaited.

555         Seventy unique questions regarding knowledge gaps preventing the interpretation and  
556 implementation of complementary indicators were identified by global stakeholders. The  
557 collation and categorization of these questions will hopefully serve as a useful resource for  
558 helping to define future research priorities as we approach the trachoma elimination endgame.

559         Our study had several limitations. Messaging that not all tests would yield individual  
560 results was included in the FGD topic guide and stated by the research assistant while conducting  
561 the FGD. However, it is clear from the transcripts that participants did not adequately understand  
562 that they would not always receive individual results for each sample type, making conclusions  
563 difficult to apply to surveillance settings, where participants could not expect individual results  
564 and/or treatment. Furthermore, we note that asking community members if they would  
565 hypothetically participate in each sample collection type may yield different results than actually  
566 presenting participants with the opportunity to be tested. In addition, community FGDs and IDIs  
567 only took place in a selection of sites within one country. There are likely to be differing views  
568 across the trachoma-endemic world.

569         In attempting to evaluate the opinion of a variety of trachoma stakeholders, the  
570 stakeholder survey was disseminated to as wide an audience as possible, resulting in an  
571 opportunistic sample. While an opportunistic sample has implications for generalizability, the  
572 multiple avenues of survey dissemination, the offering of multiple languages of the survey, and  
573 the diverse geographic representation of respondents indicate that the results are likely fairly  
574 representative of trachoma stakeholders as a whole.

575 Strengths and barriers from the IDIs were used to formulate the questions for the  
576 stakeholder survey. In order to preserve the intent of these responses, the items in the stakeholder  
577 survey could have been perceived as overly positive (for the strengths) and negative (for the  
578 barriers), which may have had an effect in biasing stakeholders' level of agreement with each  
579 item. In addition, the factual accuracy of the statements offered by the IDIs (for example, that  
580 one test may be more "accurate" than another) is debatable, which may have hindered  
581 interpretation of participants' agreement with these items. There may have also been potential  
582 strengths and barriers to each method not identified by IDI respondents (such as the potential  
583 benefit of being able to test blood spots for multiple infections). In each case, to avoid biasing  
584 the selection of strengths and barriers presented in the questionnaire, care was taken to preserve  
585 the original content and meaning from the IDIs. However, future surveys may wish to provide  
586 more comprehensive lists of strengths and barriers and more neutral question wording (for  
587 example, by allowing respondents to rate the acceptability of different methods, rather than their  
588 agreement with subjective statements).

589 Future work would be needed in order to study the opinions of communities in other  
590 regions to have more confidence in the generalizability of our results. A deeper exploration into  
591 the attitudes and perceptions of blood testing among the Maasai ethnic group, along with the  
592 effectiveness of potential education or sensitization strategies, is warranted in order to ensure this  
593 group is equitably represented in future trachoma programming. In addition, a study of non-  
594 response rates in studies where additional indicators are collected would yield information about  
595 the acceptability of different sample collection methods for trachoma detection during real-world  
596 program activities.

597 Conclusions

598           We found that conjunctival photography, infection testing, and serology were all  
599 generally acceptable to community members in Tanzania. Critical themes included participants  
600 not wanting to suffer harm from the diagnostic process and the importance of (perceived) test  
601 accuracy. Many of the perceived disadvantages mentioned by community members in Tanzania,  
602 such as fear of undue discomfort or adverse consequences of participating in the diagnostic  
603 process or mistrust of the test purpose (for serology) are potential focus areas for outreach by  
604 healthcare workers and other partners prior to implementation. This need for community  
605 education on the risks and benefits of participation of each of the methods was underscored in  
606 interviews with public health practitioners in Tanzania. According to both Tanzanian public  
607 health practitioners and global stakeholders, questions of feasibility remain, especially for  
608 infection testing and serology. The fact that in general, all methods were acceptable to  
609 community members is positive, as it may be that each indicator has a role to play for trachoma  
610 elimination surveillance purposes.

611

612 **Funding**

613 Study activities were funded by the International Trachoma Initiative. AWS is a staff member of  
614 the World Health Organization. RBs salary was funded by the Wellcome Trust (206275/Z/17/Z).

615 **Competing Interests**

616 I have read the journal's policy and the authors of this manuscript have the following competing  
617 interests: KKR, PJH, and PME are employees of the International Trachoma Initiative (ITI), a  
618 program of The Task Force for Global Health, which receives an operating budget and research  
619 funds from Pfizer Inc., the manufacturers of Zithromax (azithromycin). EMHE receives salary  
620 support from ITI, and PM and JMM were contractors of ITI for the duration of field activities in  
621 Tanzania. Pfizer, Inc. had no role in in the study conception or design; data collection, analysis,  
622 or interpretation; writing of the report; or the decision to publish this work.

623 **Authors' Contributions**

624 KKR, EMHE, and AWS conceived of the study; KKR, RB, TDH, GK, TBM, and EMHE  
625 designed the study protocols; PME and PJH reviewed the Tanzania study protocol; GK, JMM,  
626 PM, SGM, and KKR carried out field coordination; KKR, JMM, and PM carried out data  
627 collection; KKR conducted data analysis; KKR, TBM, JMM, PM, and EMHE conducted data  
628 interpretation; KKR prepared the original draft of the manuscript; all authors critically reviewed  
629 the manuscript and approved the final manuscript for publication.

630 **Acknowledgements**

631 The authors wish to thank the participants of the focus group discussions, in-depth interviews,  
632 and the survey respondents for their involvement in this project.

633 **Data availability statement**

634 Study data will be made available upon reasonable request to the corresponding author.



635 **Disclaimer**

636 The authors alone are responsible for the views expressed in this article and they do not  
637 necessarily represent the views, decisions or policies of the institutions with which they are  
638 affiliated.

639

## 640 References

- 641 1. Gambhir M, Grassly NC, Burton MJ, Solomon AW, Taylor HR, Mabey DC, et al. Estimating the  
642 Future Impact of a Multi-Pronged Intervention Strategy on Ocular Disease Sequelae Caused by  
643 Trachoma: A Modeling Study. *Ophthalmic Epidemiol.* 2015;22(6):394-402.
- 644 2. World Health Organization. Validation of elimination of trachoma as a public health problem.  
645 Geneva, Switzerland: World Health Organization; 2016.
- 646 3. World Health Organization. Report of the third Global Scientific Meeting on Trachoma  
647 Elimination. Baltimore, MD: Johns Hopkins University; 2010.
- 648 4. Wright HR, Taylor HR. Clinical examination and laboratory tests for estimation of trachoma  
649 prevalence in a remote setting: what are they really telling us? *Lancet Infect Dis.* 2005;5(5):313-20.
- 650 5. Ramadhani AM, Derrick T, Macleod D, Holland MJ, Burton MJ. The Relationship between Active  
651 Trachoma and Ocular Chlamydia trachomatis Infection before and after Mass Antibiotic Treatment. *PLoS*  
652 *Negl Trop Dis.* 2016;10(10):e0005080.
- 653 6. Solomon AW, Harding-Esch E, Alexander ND, Aguirre A, Holland MJ, Bailey RL, et al. Two doses  
654 of azithromycin to eliminate trachoma in a Tanzanian community. *N Engl J Med.* 2008;358(17):1870-1.
- 655 7. Butcher R, Sokana O, Jack K, Sui L, Russell C, Last A, et al. Clinical signs of trachoma are prevalent  
656 among Solomon Islanders who have no persistent markers of prior infection with Chlamydia  
657 trachomatis. *Wellcome Open Res.* 2018;3:14.
- 658 8. Trotignon G, Jones E, Engels T, Schmidt E, McFarland DA, Macleod CK, et al. The cost of mapping  
659 trachoma: Data from the Global Trachoma Mapping Project. *PLoS Negl Trop Dis.* 2017;11(10):e0006023-  
660 e.
- 661 9. Harding-Esch EM, Burgert-Brucker CR, Jimenez C, Bakhtiari A, Willis R, Bejiga MD, et al. Tropical  
662 Data: Approach and Methodology as Applied to Trachoma Prevalence Surveys. *Ophthalmic*  
663 *Epidemiology.* 2023;30(6):544-60.
- 664 10. Jimenez C, Gower E, Harding-Esch E, West SK. Harnessing photography and image recognition  
665 technology to aid in the elimination of trachoma. *Community Eye Health.* 2022;35(114):24.
- 666 11. Solomon AW, Pavluck AL, Courtright P, Aboe A, Adamu L, Alemayehu W, et al. The Global  
667 Trachoma Mapping Project: Methodology of a 34-Country Population-Based Study. *Ophthalmic*  
668 *Epidemiology.* 2015;22(3):214-25.
- 669 12. Harding-Esch EM, Naufal F, Saboya M, Jimenez C, West SK. Use of photography for support of  
670 trachoma grading: progress report. 2021.
- 671 13. Martin DL, Saboyà-Díaz MI, Abashawl A, Alemayeh W, Gwyn S, Hooper PJ, et al. The use of  
672 serology for trachoma surveillance: Current status and priorities for future investigation. *PLoS Negl Trop*  
673 *Dis.* 2020;14(9):e0008316-e.
- 674 14. World Health Organization. Trachoma Alternative Indicators Study Data review. Geneva,  
675 Switzerland: World Health Organization; 2016.
- 676 15. World Health Organization. Informal consultation on end-game challenges for trachoma  
677 elimination. Task Force for Global Health, Decatur, United States of America. Geneva: World Health  
678 Organization; 2022. 7–9 December 2021.
- 679 16. World Health Organization. WHO handbook for guideline development - 2nd ed. Geneva,  
680 Switzerland: World Health Organization; 2014.
- 681 17. Senyonjo L, Downs P, Schmidt E, Bailey R, Blanchet K. Lessons learned for surveillance strategies  
682 for trachoma elimination as a public health problem, from the evaluation of approaches utilised by  
683 Guinea worm and onchocerciasis programmes: A literature review. *PLoS Negl Trop Dis.*  
684 2021;15(1):e0009082-e.
- 685 18. Oldenburg CE, Aragie S, Amza A, Solomon AW, Brogdon J, Arnold BF, et al. Can we eradicate  
686 trachoma? A survey of stakeholders. *Br J Ophthalmol.* 2021;105(8):1059-62.

- 687 19. World Health Organization. Ending the neglect to attain the Sustainable Development Goals – A  
688 road map for neglected tropical diseases 2021–2030. Geneva, Switzerland World Health Organization;  
689 2020.
- 690 20. International Trachoma Initiative. Global Atlas of Trachoma Decatur, Georgia 2020 [Available  
691 from: [trachomaatlas.org](http://trachomaatlas.org)].
- 692 21. Magnani R, Sabin, Keith, Saidel, Tobi, Heckathorn, Douglas. Review of sampling hard-to-reach  
693 and hidden populations for HIV surveillance. *AIDS*. 2005;19:S67-S72.
- 694 22. Lumivero. NVivo 13 (2020, R1).
- 695 23. Gale NK, Heath G, Cameron E, Rashid S, Redwood S. Using the framework method for the  
696 analysis of qualitative data in multi-disciplinary health research. *BMC Medical Research Methodology*.  
697 2013;13(1):117.
- 698 24. SurveyMonkey Inc. San Mateo, California, USA [Available from: [www.surveymonkey.com](http://www.surveymonkey.com)].
- 699 25. R Core Team. R: A language and environment for statistical computing. Vienna, Austria: R  
700 Foundation for Statistical Computing; 2021.
- 701 26. Sahota RS, Sanha S, Last A, Cassama E, Goncalves A, Kelly AH, et al. Acceptability and perceived  
702 utility of different diagnostic tests and sample types for trachoma surveillance in the Bijagos Islands,  
703 Guinea Bissau. *Trans R Soc Trop Med Hyg*. 2021;115(8):847-53.
- 704 27. Geissler PW, Pool R. Editorial: Popular concerns about medical research projects in sub-Saharan  
705 Africa – a critical voice in debates about medical research ethics. *Tropical Medicine & International  
706 Health*. 2006;11(7):975-82.
- 707 28. O'Neill S, Dierickx S, Okebe J, Dabira E, Gryseels C, d'Alessandro U, et al. The Importance of  
708 Blood Is Infinite: Conceptions of Blood as Life Force, Rumours and Fear of Trial Participation in a Fulani  
709 Village in Rural Gambia. *PLoS One*. 2016;11(8):e0160464.
- 710 29. Inocencio da Luz R, Phanzu DM, Kiabanzawoko ON, Miaka E, Verlé P, De Weggheleire A, et al.  
711 Feasibility of a dried blood spot strategy for serological screening and surveillance to monitor  
712 elimination of Human African Trypanosomiasis in the Democratic Republic of the Congo. *PLoS Negl Trop  
713 Dis*. 2021;15(6):e0009407.
- 714 30. World Health Organization. Malaria surveillance, monitoring and evaluation: a reference  
715 manual. Geneva, Switzerland World Health Organization; 2018.
- 716 31. World Health Organization. World malaria report 2022. Geneva; 2022.
- 717 32. Mtuy TB, Bardosh K, Ngondi J, Mwingira U, Seeley J, Burton M, et al. Understanding hard-to-  
718 reach communities: local perspectives and experiences of trachoma control among the pastoralist  
719 Maasai in northern Tanzania. *J Biosoc Sci*. 2021;53(6):819-38.
- 720 33. Mtuy TB, Burton MJ, Mwingira U, Ngondi JM, Seeley J, Lees S. Knowledge, perceptions and  
721 experiences of trachoma among Maasai in Tanzania: Implications for prevention and control. *PLoS Negl  
722 Trop Dis*. 2019;13(6):e0007508-e.
- 723 34. Desmond N, Solomon AW, Massae PA, Lema N, Anemona A, Foster A, et al. Acceptability of  
724 azithromycin for the control of trachoma in Northern Tanzania. *Trans R Soc Trop Med Hyg*.  
725 2005;99(9):656-63.
- 726 35. Gooden TE, Mkhoi ML, Mdoe M, Mwalukunga LJ, Senkoro E, Kibusi SM, et al. Barriers and  
727 facilitators of people living with HIV receiving optimal care for hypertension and diabetes in Tanzania: a  
728 qualitative study with healthcare professionals and people living with HIV. *BMC Public Health*.  
729 2023;23(1):2235.
- 730 36. Mfuh KO, Abanda NN, Titanji BK. Strengthening diagnostic capacity in Africa as a key pillar of  
731 public health and pandemic preparedness. *PLOS Glob Public Health*. 2023;3(6):e0001998.
- 732 37. Bisanzio D, Butcher R, Turbé V, Matsumoto K, Dinesh C, Massae P, et al. Accuracy, acceptability  
733 and feasibility of photography for use in trachoma surveys: a mixed methods study in Tanzania. *Int  
734 Health*. 2023.

735 38. Wang Q, Yang L, Jin H, Lin L. Vaccination against COVID-19: A systematic review and meta-  
736 analysis of acceptability and its predictors. *Prev Med.* 2021;150:106694.  
737 39. Azanaw J, Endalew M, Zenbaba D, Abera E, Chattu VK. COVID-19 vaccine acceptance and  
738 associated factors in 13 African countries: A systematic review and meta-analysis. *Front Public Health.*  
739 2022;10:1001423.  
740 40. Goldman RD, Yan TD, Seiler M, Parra Cotanda C, Brown JC, Klein EJ, et al. Caregiver willingness  
741 to vaccinate their children against COVID-19: Cross sectional survey. *Vaccine.* 2020;38(48):7668-73.  
742 41. McCauley AP, West S, Lynch M. Household decisions among the Gogo people of Tanzania:  
743 determining the roles of men, women and the community in implementing a trachoma prevention  
744 program. *Soc Sci Med.* 1992;34(7):817-24.  
745
